# Supplementary material for: Biochemical and structural studies reveal differences and commonalities among cap-snatching endonucleases from segmented negative-strand RNA viruses
Source: PubMed Central journal article supplement (PMC6314124; doi:10.1074/jbc.ra118.004373), 2018-10-22
Supplement: supp_RA118.004373_138705_2_supp_222466_pgwcbb.pdf [file supp_RA118.004373_138705_2_supp_222466_pgwcbb.pdf]

## Supporting information

### *Biochemical and structural studies on the putative Crimean-Congo hemorrhagic fever virus capsid-snatching endonuclease*

Tobias Holm<sup>1</sup>, Janine-Denise Kopicki<sup>2</sup>, Carola Busch<sup>1</sup>, Silke Olschewski<sup>1</sup>, Maria Rosenthal<sup>1</sup>, Charlotte Uetrecht<sup>2,3</sup>, Stephan Günther<sup>1</sup> and Sophia Reindl<sup>1,\*</sup>

#### Contents:

##### Figure S1

Sequence alignment of L protein sequences from different nairoviruses.

##### Figure S2

Constructs tested for soluble expression in *Escherichia coli* for (A) the CCHFV endonuclease and (B) the RVFV endonuclease.

##### Figure S3

Secondary structure based sequence alignment of endonuclease sequences from viruses of the *Phenui-*, *Hanta-* and *Peribunyaviridae* families.

##### Figure S4

The RVFV endonuclease belongs to the class of His+ endonucleases.

##### Figure S5

Comparison of IVT substrate degradation by 5 different endonuclease proteins of the order *Bunyavirales*.

##### Figure S6

Limited Proteolysis of CCHFV endonuclease protein and fragment characterization.

##### Figure S7

Trypsin digestion of the CCHFV endonuclease domain monitored by native MS.

##### Figure S8

SAXS scattering curves of nairovirus endonuclease proteins.

##### Figure S9

Homology-based structural models of the core of the CCHFV putative endonuclease structure and comparison to the SAXS envelope.

##### Figure S10

Affinity to manganese ions is strongly reduced in the CCHFV E656A mutant compared to the wild type.

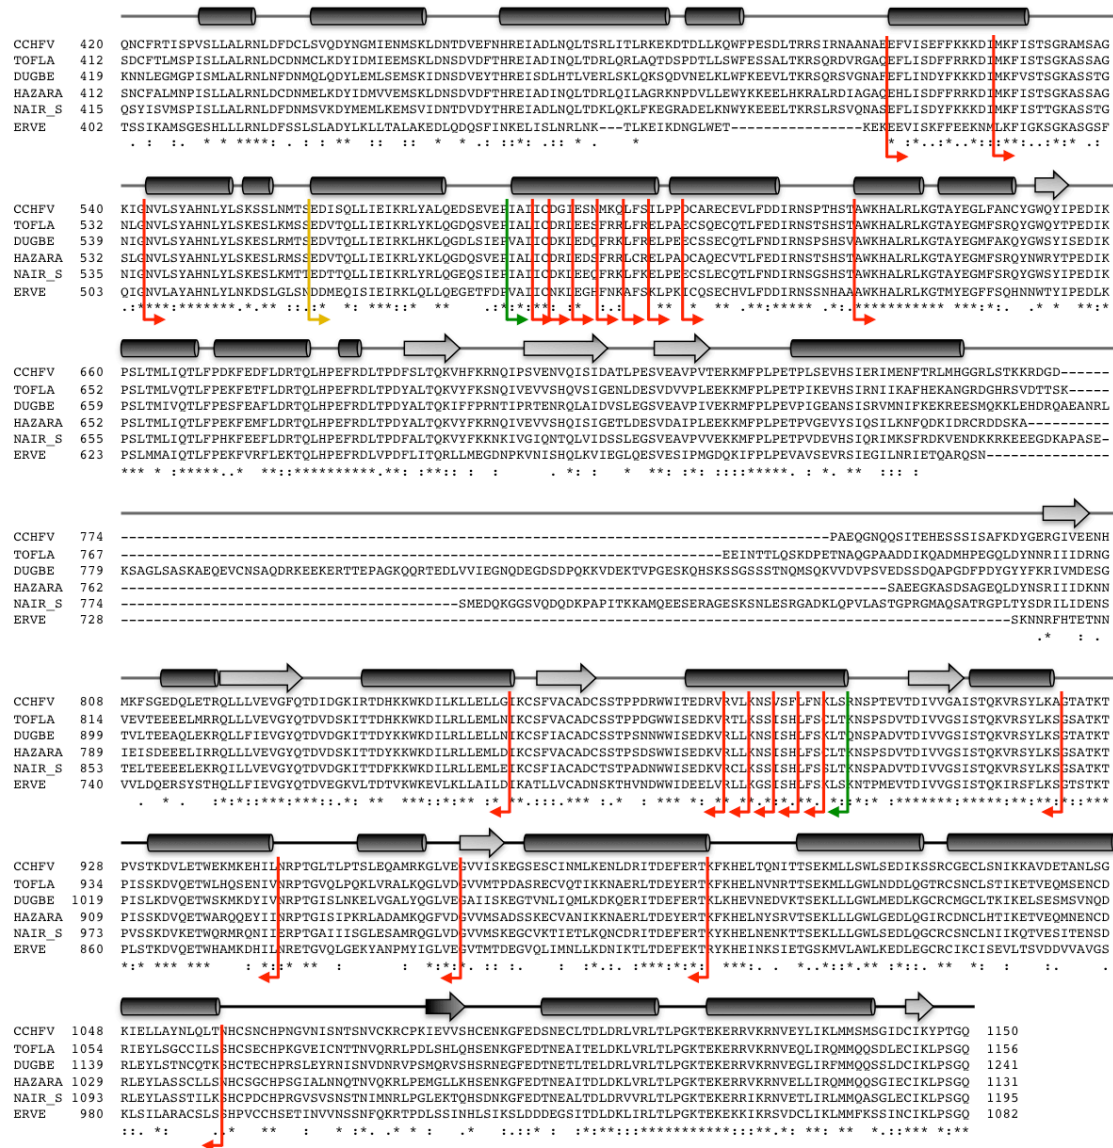

**Figure S1. Sequence alignment of L protein sequences from different nairoviruses.** Only the residue range from ~400 - 1150 was used. Predicted secondary structure elements are shown as cylinders for  $\alpha$ -helices and arrows for  $\beta$ -sheets. Starting and ending residues from tested constructs are indicated with red arrows for insoluble, yellow for low solubility and green arrows for soluble expression.

A

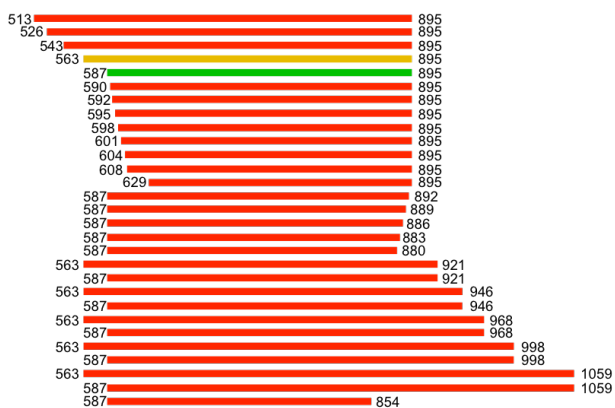

B

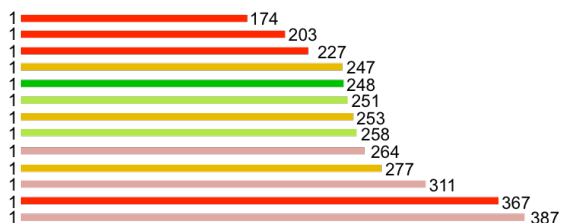

**Figure S2. Constructs tested for soluble expression in *Escherichia coli* for (A) the CCHFV endonuclease and (B) the RVFV endonuclease. Residue ranges are indicated, colored according to solubility (red: insoluble expression, light red - yellow - light green: low solubility with increasing yields, green: soluble expression).**

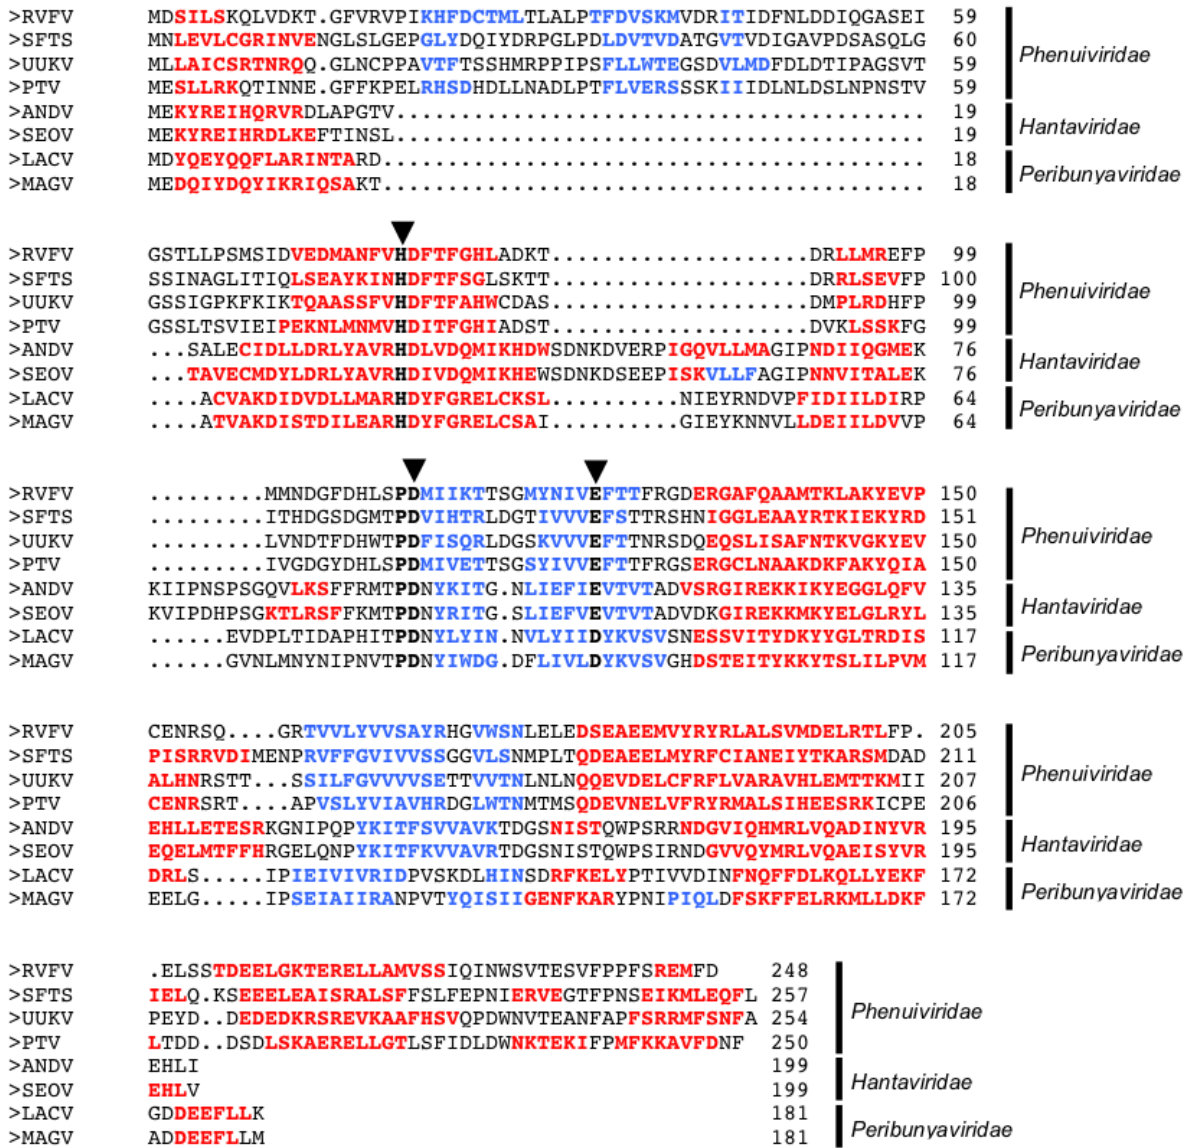

**Figure S3. Secondary structure based sequence alignment of endonuclease sequences from viruses of the *Phenui*-, *Hanta*- and *Peribunyaviridae* families.**  $\alpha$ -helices are shown with red letters,  $\beta$ -sheets with blue letters. Triangles mark conserved active site residues. All depicted sequences can be predicted to be a His<sup>+</sup> endonuclease, according to the existence of a conserved histidine in a large  $\alpha$ -helical region. (RVFV - Rift valley fever virus; SFTS - Severe fever with thrombocytopenia syndrome virus; UUKV - Uukuniemi virus; PTV - Punta toro virus; ANDV - Andes virus; SEOV - Seoul virus; LACV - La Crosse virus; MAGV - Maguari virus)

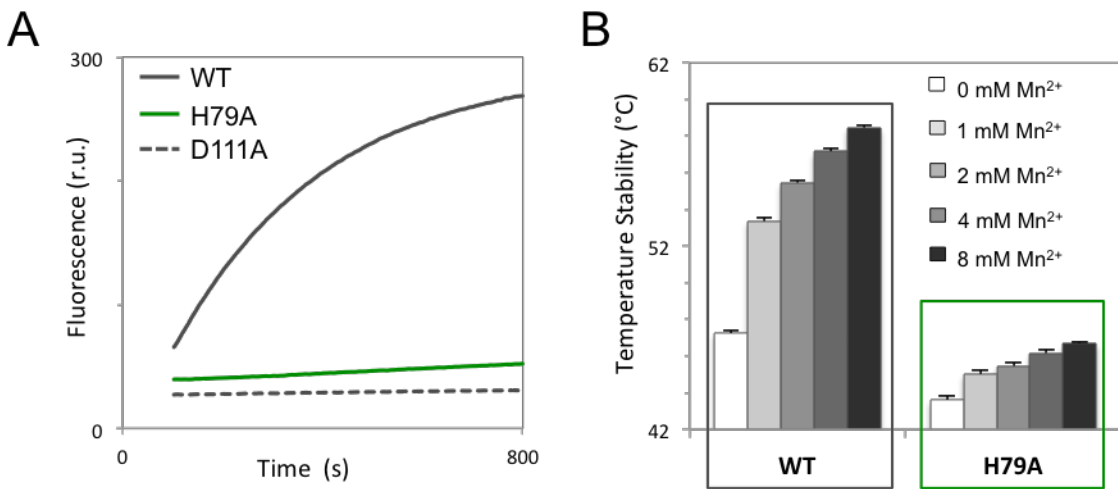

**Figure S4. The RRVFV endonuclease belongs to the class of His<sup>+</sup> endonucleases.** Purified RRVFV endonuclease WT, D111A and H79A mutant tested for nuclease activity and manganese binding. **(A)** The fluorescence increase upon degradation of 0.1  $\mu$ M 12mer FRET substrate (6-FAM-5'AAAAAAAAAAAAA3'-BHQ-1) by 1.0  $\mu$ M wild type protein in presence of 2 mM MnCl<sub>2</sub> was measured compared to H79A and D111A mutant. **(B)** The thermal stabilization of 3.5  $\mu$ M RRVFV endonuclease wild type and H79A mutant protein by MnCl<sub>2</sub> in increasing concentrations was measured by thermal shift assay. Columns represent the temperature at half of the maximum fluorescence intensity obtained for each condition. Shown is the mean of three independent measurements +/- standard deviation.

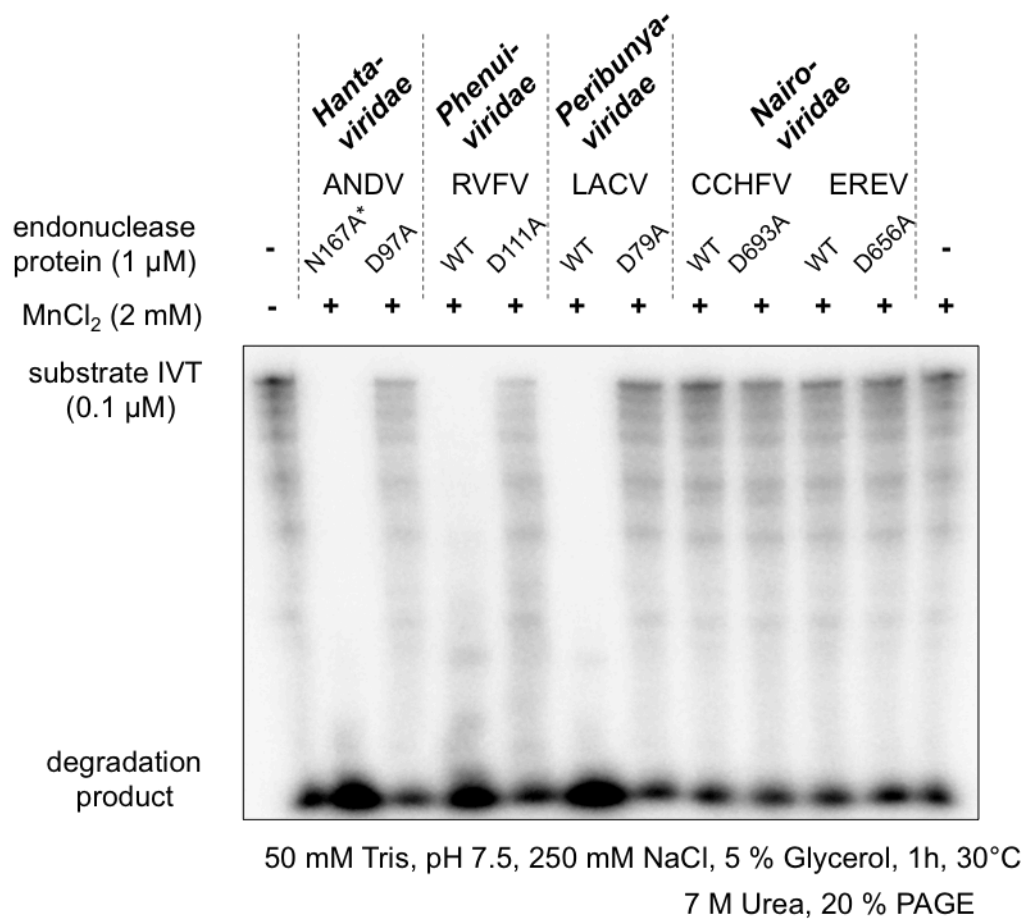

**Figure S5. Comparison of IVT substrate degradation by 5 different endonuclease proteins of the order *Bunyavirales*.** 20 nM of purified wildtype and active site mutants of each endonuclease protein were incubated with 2 nmol of *in vitro* transcribed RNA substrate in the presence of 2 mM MnCl<sub>2</sub> for 1 h at 30°C. Reaction products were separated by denaturing PAGE and visualized by autoradiography. \* expressible mutant, equivalent to wild-type (1).

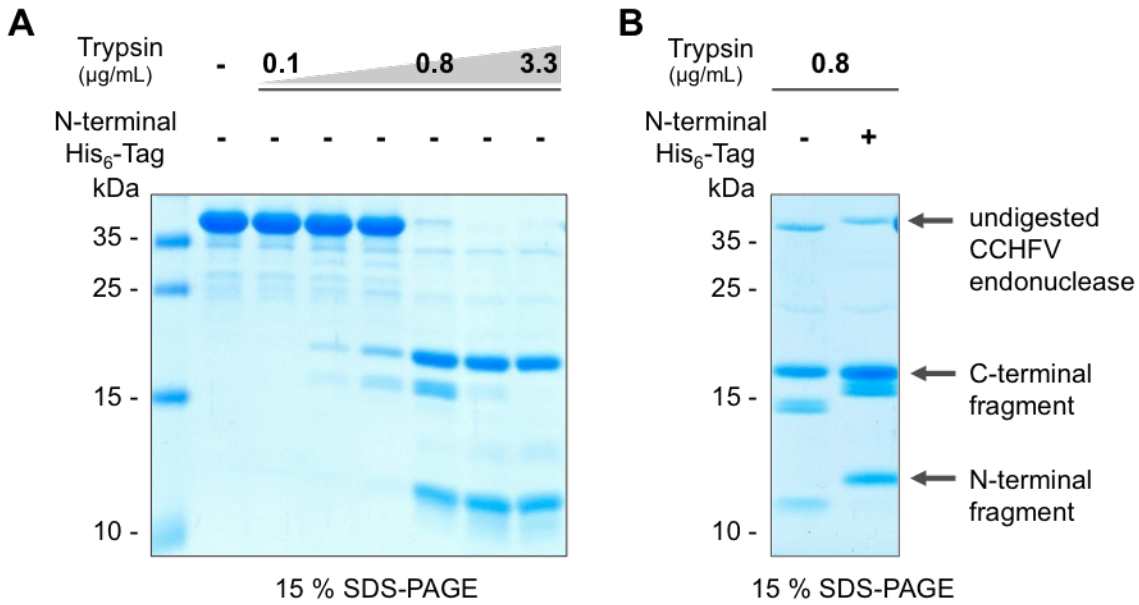

**Figure S6. Limited Proteolysis of CCHFV endonuclease protein and fragment characterization. (A)** CCHFV endonuclease protein without His-tag at a concentration of 0.1 mg/mL was subjected to limited proteolysis with trypsin for 1 h at 4°C. The Coomassie-stained SDS gel shows the resulting fragmentation pattern with trypsin concentrations from 0.1 µg/mL to 3.3 µg/mL. Three fragments are visible at 0.8 µg/mL trypsin, the middle one is not visible at 1.6 µg/mL trypsin. **(B)** CCHFV endonuclease with or without N-terminal His-tag was subjected to 0.8 µg/mL trypsin proteolysis for 1 h at 20°C. The gel shows the fragmentation pattern of both. The two lower bands of the His-tagged protein have a higher molecular weight indicating the His-tag to be present. The Coomassie-stained bands are assigned according to mass spectrometry analysis.

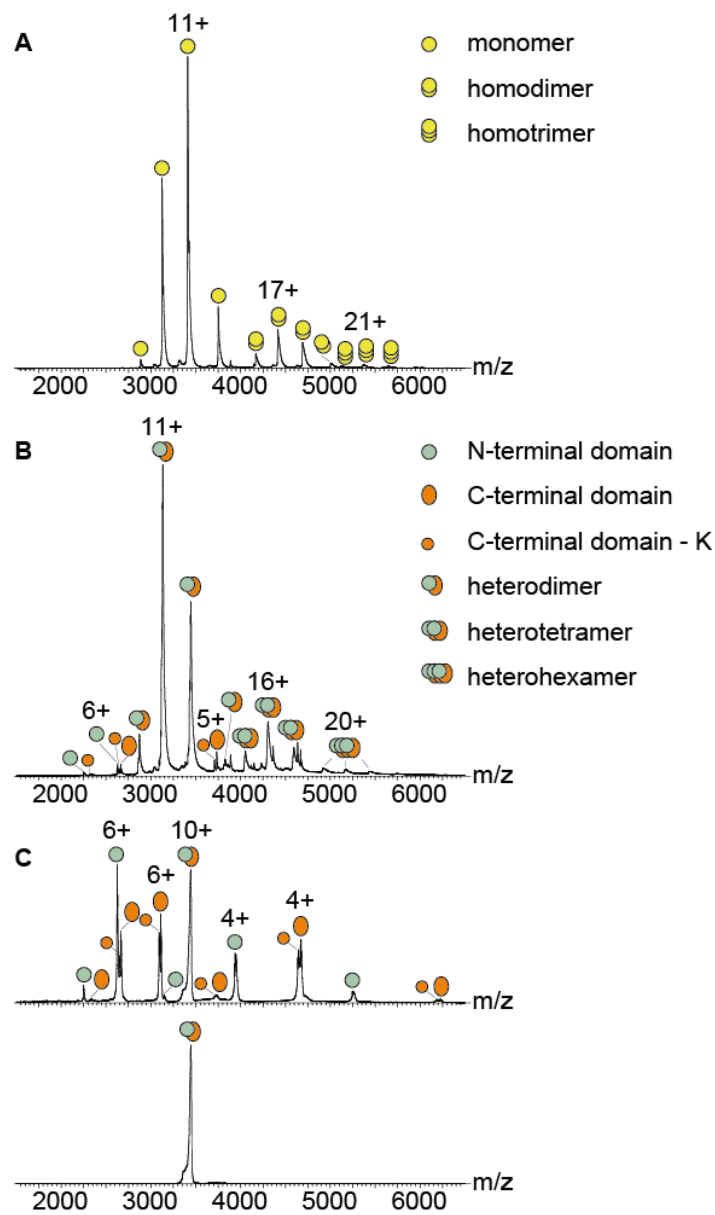

D

|                                      | Species              | Theor. mass | Exp. mass | St. dev. | FWHM  |
|--------------------------------------|----------------------|-------------|-----------|----------|-------|
| undigested<br>CCHFV<br>endo          | monomer              | 37,498      | 37,498    | 5        | 155   |
|                                      | homodimer            | 74,996      | 75,060    | 50       | 500   |
|                                      | homotrimer           | 112,494     | 112,580   | 70       | 1,020 |
| trypsin<br>digested<br>CCHFV<br>endo | N-terminal domain    | 15,730      | 15,729    | 1        | 29    |
|                                      | C-terminal domain    | 18,668      | 18,667    | 2        | 36    |
|                                      | C-terminal domain -K | 18,540      | 18,539    | 1        | 78    |
|                                      | heterodimer          | 34,398      | 34,430    | 50       | 280   |
|                                      | heterotetramer       | 68,796      | 68,890    | 20       | 580   |
|                                      | heterohexamer        | 103,194     | 103,370   | 40       | 1,980 |

**Figure S7: Trypsin digestion of the CCHFV endonuclease domain monitored by native MS.** ESI-MS of 10  $\mu$ M undigested (A) and digested (B) CCHFV endonuclease domain in 250 mM ammonium acetate, pH 7.4 recorded at 10 V acceleration into the collision cell. Monomeric endonuclease domain was identified as most abundant species in case of the undigested sample whereas a heterodimeric complex of C-terminal and N-terminal subunit was detected in the trypsin-treated sample. (C) MS/MS analysis of 10<sup>+</sup>-charged peak at 3375 *m/z* performed on 50  $\mu$ M digested endonuclease domain at 50 V and 100 V for collision determines accurate masses of the two subunits by which means the boundaries of the excised



fragment were derived (cleavage after R704 and R733). Simultaneously, this experiment shows the presence of a shorter version (-K, lacking K734) of the C-terminal domain resulting from cleavage at an alternative site next to R733. Thus, two different C-terminal domains result from cleavage at two adjacent sites, R733 and K734, respectively. **(D)** Masses of different protein species from undigested and trypsin-digested CCHFV endonuclease domain were determined from at least three independent MS measurements. They are listed together with the respective values for standard deviation and average full width of the peak at half maximum (FWHM) along with the theoretically calculated molecular weight. FWHM values are given for the whole peak area where individual species were not fully resolved. All listed values are in Da.

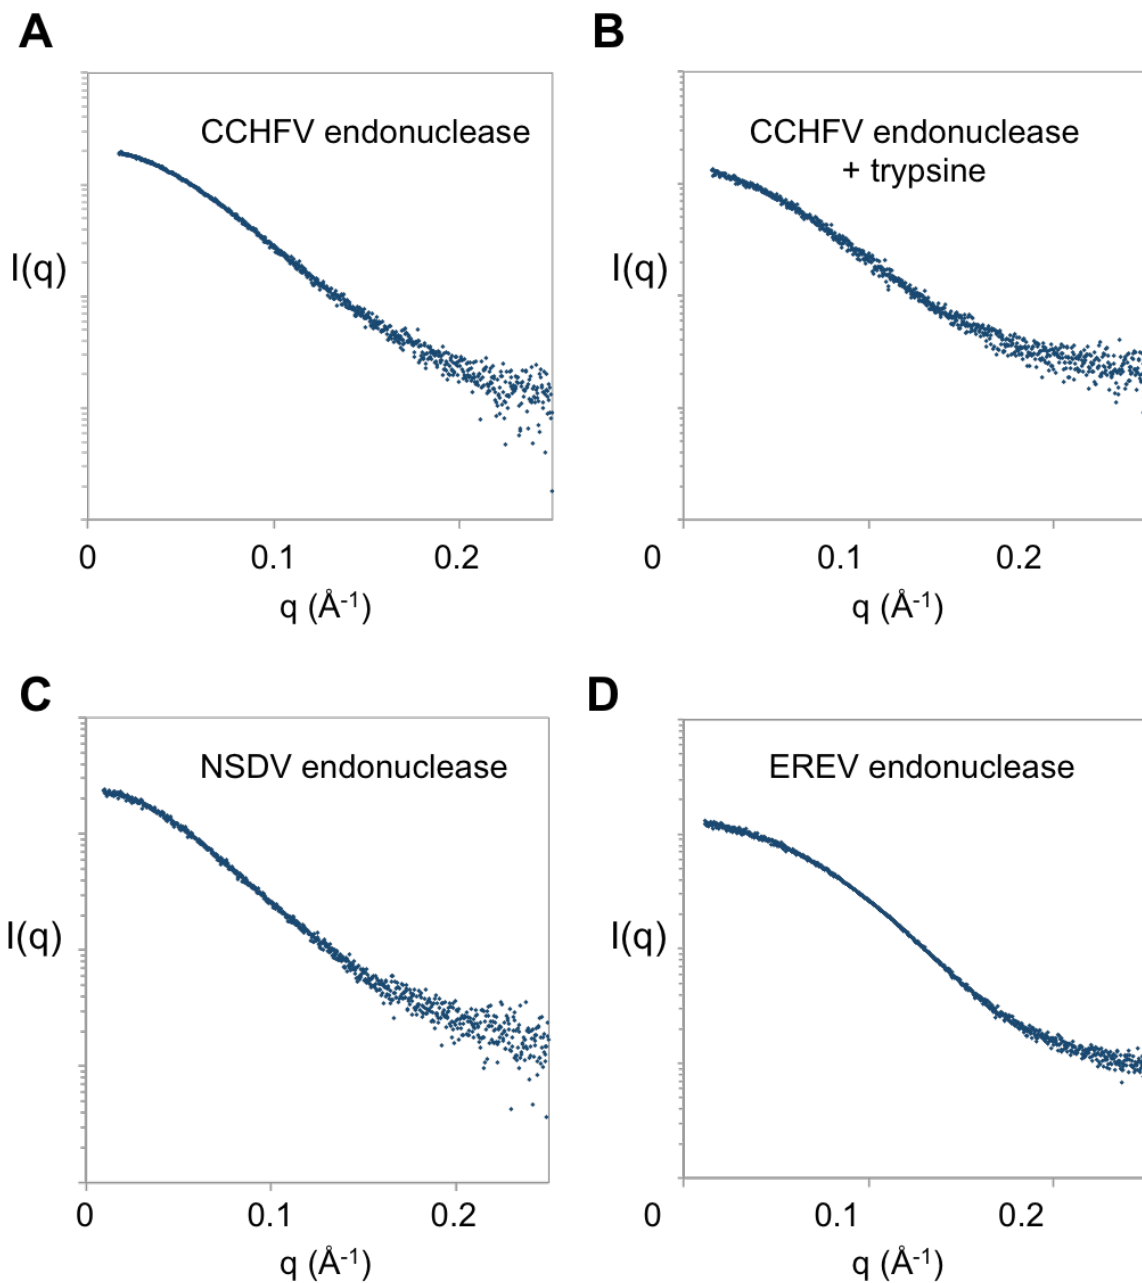

**Figure S8. SAXS scattering curves of nairovirus endonuclease proteins.** The plots of experimental scattering data were obtained by measuring 3 different protein concentrations and are represented for CCHFV endonuclease before trypsin digestion in **(A)** and after digestion with trypsin **(B)**. The curves for NSDV endonuclease and EREV endonuclease are represented in **(C)** and **(D)**, respectively.

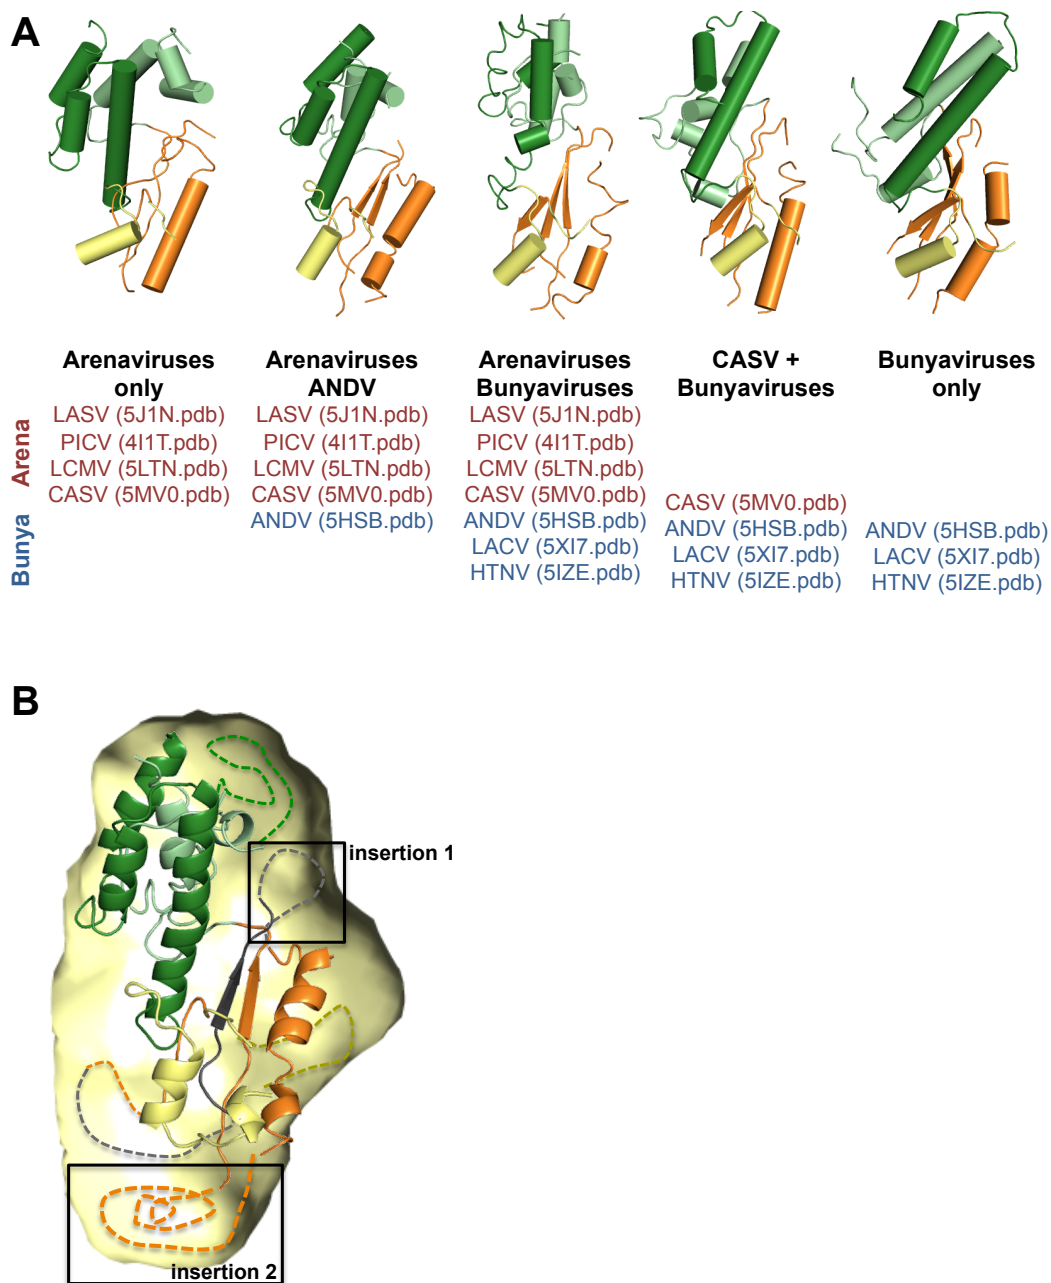

**Figure S9. Homology-based structural models of the core of the CCHFV putative endonuclease structure and comparison to the SAXS envelope.** (A) Different computational models of the CCHFV putative endonuclease domain created by MODELLER using varying input parameters show the high variability in the resulting models. The atomic structures used as templates for the different models are given, including the corresponding pdb-codes. Regions, which were extremely variable between the models and did not contain any secondary structure elements are not shown. (B) The core of the CCHFV putative endonuclease structure, modeled using a set of atomic structures of the endonuclease from Arenaviruses and the Hantavirus Andes virus, is shown superimposed with the CCHFV putative endonuclease SAXS envelope (yellow). Regions, which are not shown in (A), are sketched with dashed lines. The regions with non-predictable secondary and tertiary structure in the homology model (dashed lines) nicely superpose with areas of additional electron density in the SAXS envelope. The peptide cleaved out by trypsin in the limited proteolysis experiments is shown in grey. Insertions 1 and 2 as mentioned in the text are marked. (LASV - Lassa virus, PICV - Pichinde virus, LCMV - lymphocytic choriomeningitis virus, CASV - California Academy of Science virus; ANDV - Andes virus; HTNV - Hantaan virus; LACV - La Crosse virus)

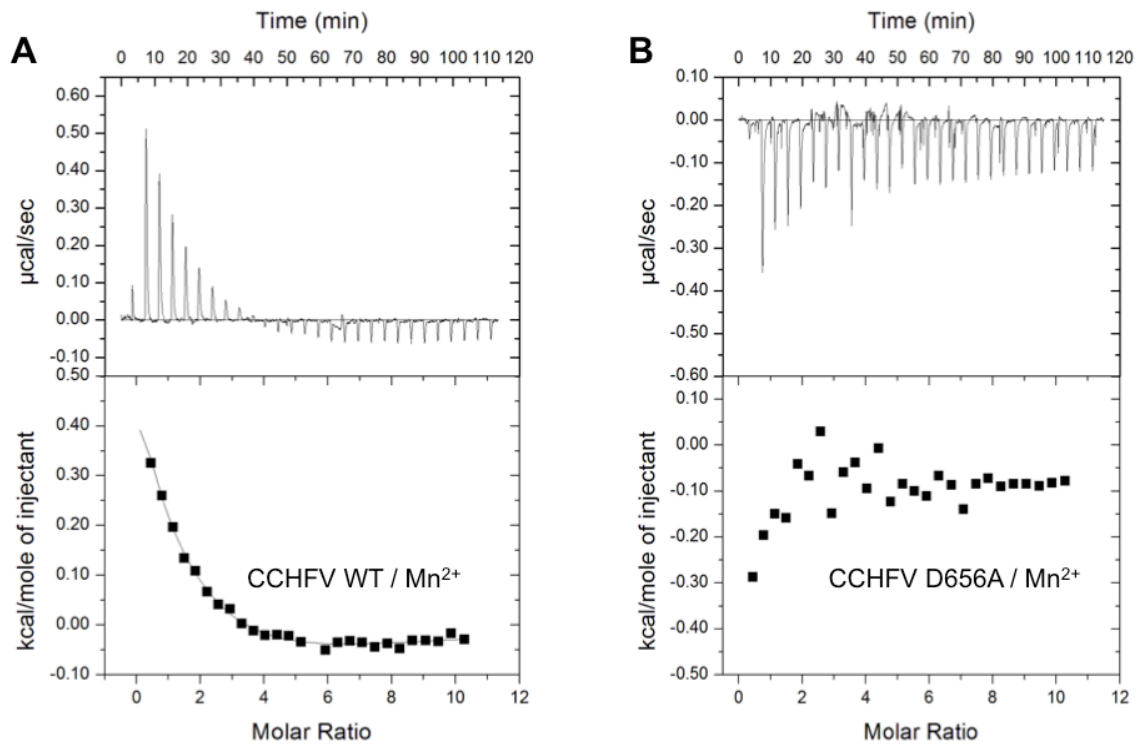

**Figure S10. Affinity to manganese ions is strongly reduced in the CCHFV E656A mutant compared to the wild type.** 100 µM of wild type (A) or D656A mutant (B) endonuclease protein was titrated with 12.5 µL injections of 8 mM MnCl<sub>2</sub> in a buffer containing 50 mM Tris, pH 7.5, 150 mM NaCl and 2.5% glycerol at 20°C using a VP-ITC calorimeter. The upper plot shows the binding isotherm and the lower plot shows the integrated values of each peak.

#### Supplemental Reference

1. Fernandez-Garcia, Y., Reguera, J., Busch, C., Witte, G., Sanchez-Ramos, O., Betzel, C., Cusack, S., Gunther, S., and Reindl, S. (2016) Atomic Structure and Biochemical Characterization of an RNA Endonuclease in the N Terminus of Andes Virus L Protein. *PLoS Pathog* **12**, e1005635
